# Supplementary material for: Speciation of copper by using a new fullerene derivative as a mixed-mode sorbent
Source: Royal Society of Chemistry journal article supplement (doi:10.1039/b605537k), 2006-01-01
Supplement: b605537k.pdf [file b605537k.pdf]

**Electronic Supplementary Information of paper entitled “Speciation of copper by using a new fullerene derivative as a mixed-mode sorbent”.  
(Paper Ref. B605537K)**

Following characterisation data (spectra of FT-IR,  $^1\text{H-NMR}$  and MALDI-TOF-MS) give complementary structural information about the  $\text{C}_{60}$ -rubeanic acid derivative.

The FT-IR spectrum (Model MAGNA-IR-500, Nicolet) of the fullerene derivative is shown in Fig. 1. The spectra for  $\text{C}_{60}$  and rubeanic acid have also been taken for comparison, both of them being in good agreement with the spectra reported in the literature.<sup>1,2</sup> The IR spectrum of the adduct in comparison with the spectra of  $\text{C}_{60}$  and rubeanic acid indicates absence of pristine modes of the acid and presence of unreacted  $\text{C}_{60}$  (peaks at 576 and 527  $\text{cm}^{-1}$ ). Analysis of this spectrum shows that it exhibits peaks at 669, 685, 802, 1020, 1100, 1260 and 2960  $\text{cm}^{-1}$ . It is clear that the C-N mode which occurs at 1203  $\text{cm}^{-1}$  in rubeanic acid is shifted to 1100  $\text{cm}^{-1}$  in this case of the adduct, as described for other fullerene derivatives;<sup>3</sup> this is another evidence for adduct formation. Similarly, other peaks at 840, 705 and 643  $\text{cm}^{-1}$  are also shifted in the adduct compared to pristine rubeanic acid, as proposed in Fig. 2 (structure of  $\text{C}_{60}$ -rubeanic acid). New modes are observed for the adduct which appears at 2960, 1260 and 1020  $\text{cm}^{-1}$  and which are absent in the reagents spectra, probably corresponding to the new bonds which are formed in the addition of the quelating agent to the fullerene core. However, the C-S and C-S-H stretching vibration tend to give rise to very weak absorption in the infrared spectrum,<sup>4</sup> and are not observed in the adduct spectrum; in addition, FT-IR neither provides information about the N-H mode in the region 3300-3100  $\text{cm}^{-1}$ .

The spectrum of  $^1\text{H}$  NMR ( $\text{C}_6\text{D}_6$ ) of the  $\text{C}_{60}$ -rubeanic acid derivative (see Fig. 3) was recorded on a Bruker Advance 400-WB spectrometer. As can be seen, it is rather strange and does not supply useful information to elucidate the chemical structure of this derivative.

The spectrum of MALDI-TOF-MS (Model 4700/TOF-TOF, Applied Biosystems) of the  $\text{C}_{60}$ -rubeanic acid derivative is depicted in Fig. 4. The sample was prepared in a mixture of acetonitrile:water (70:30), containing a final concentration of 0.1% trifluoroacetic acid and mixed with a matrix of  $\alpha$ -cyano-4-hydroxycinnamic acid ( $3 \text{ mg mL}^{-1}$ ), being the sample pH lower than 1. However, at this pH the derivative is hydrolysed; therefore in the spectrum of MALDI-TOF-MS of the derivative is observed two peaks at  $m/z$  122 and 720 corresponding to stable fragments of rubeanic acid and fullerene monocation  $\text{C}_{60}^+$ , respectively, and any peak at  $m/z$  842 corresponding to molecular weight of the derivative fullerene. According to these results, it can be assumed that the fullerene derivative has a molecular weight of 842 (see Fig. 5).

## Figures

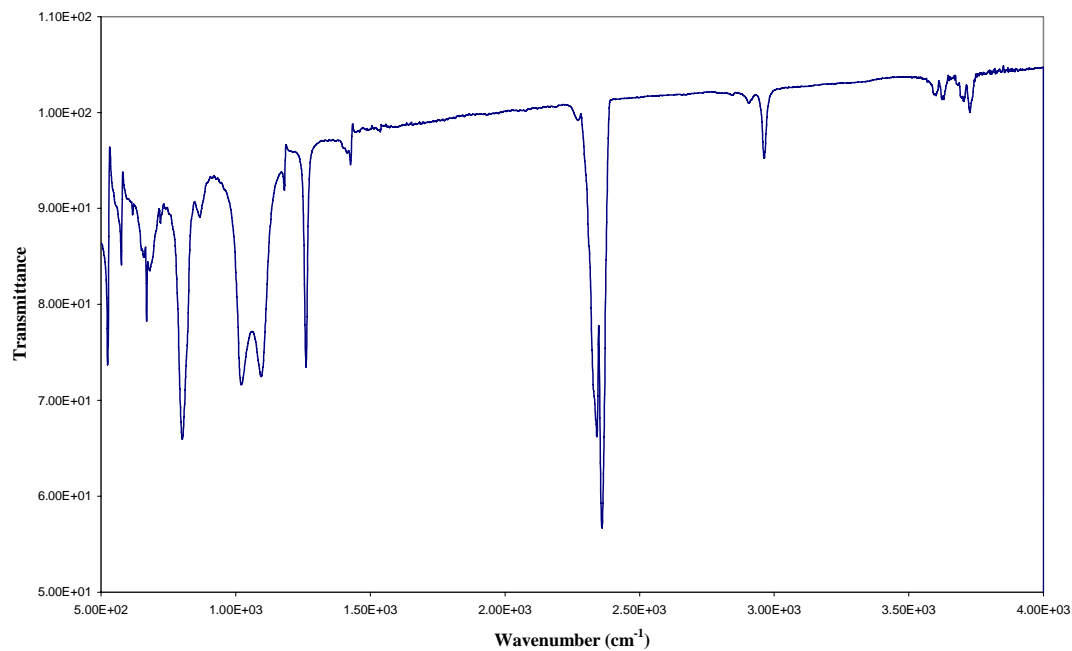

**Fig. 1** FT-IR spectrum of C<sub>60</sub>-rubeanic acid derivative.

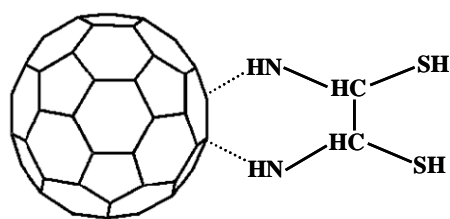

**Fig. 2** Structure of the C<sub>60</sub>-rubeanic acid derivative.

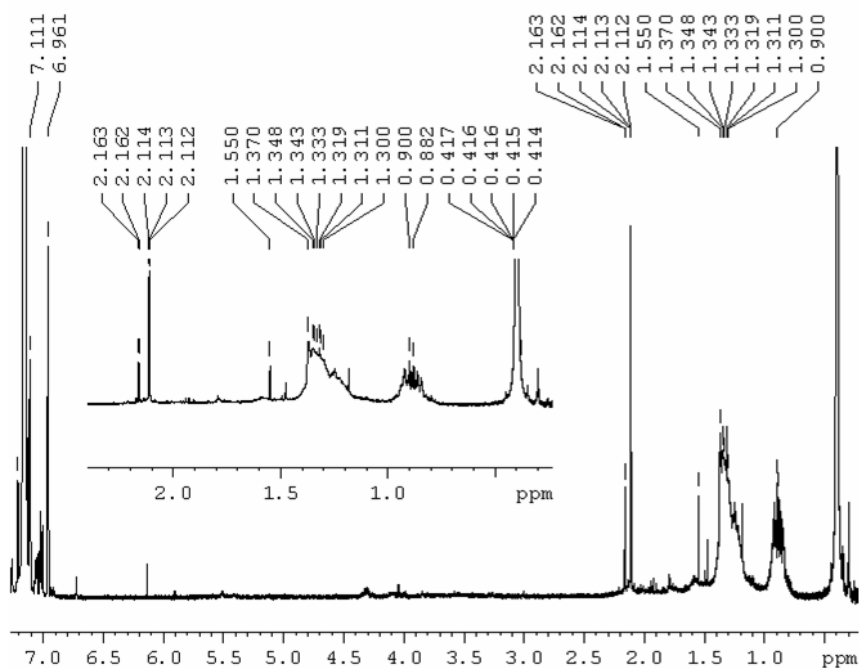

Fig. 3  $^1\text{H}$  NMR spectrum for the  $\text{C}_{60}$ -rubeanic acid derivative.

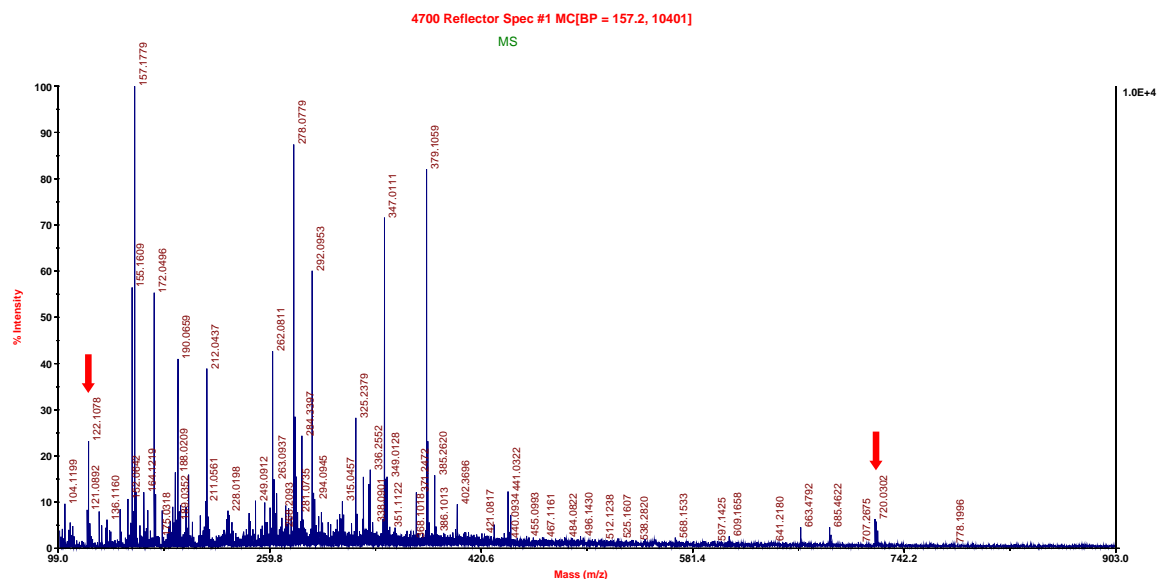

Fig. 4 MALDI-TOF-MS spectrum of  $\text{C}_{60}$ -rubeanic acid derivative.

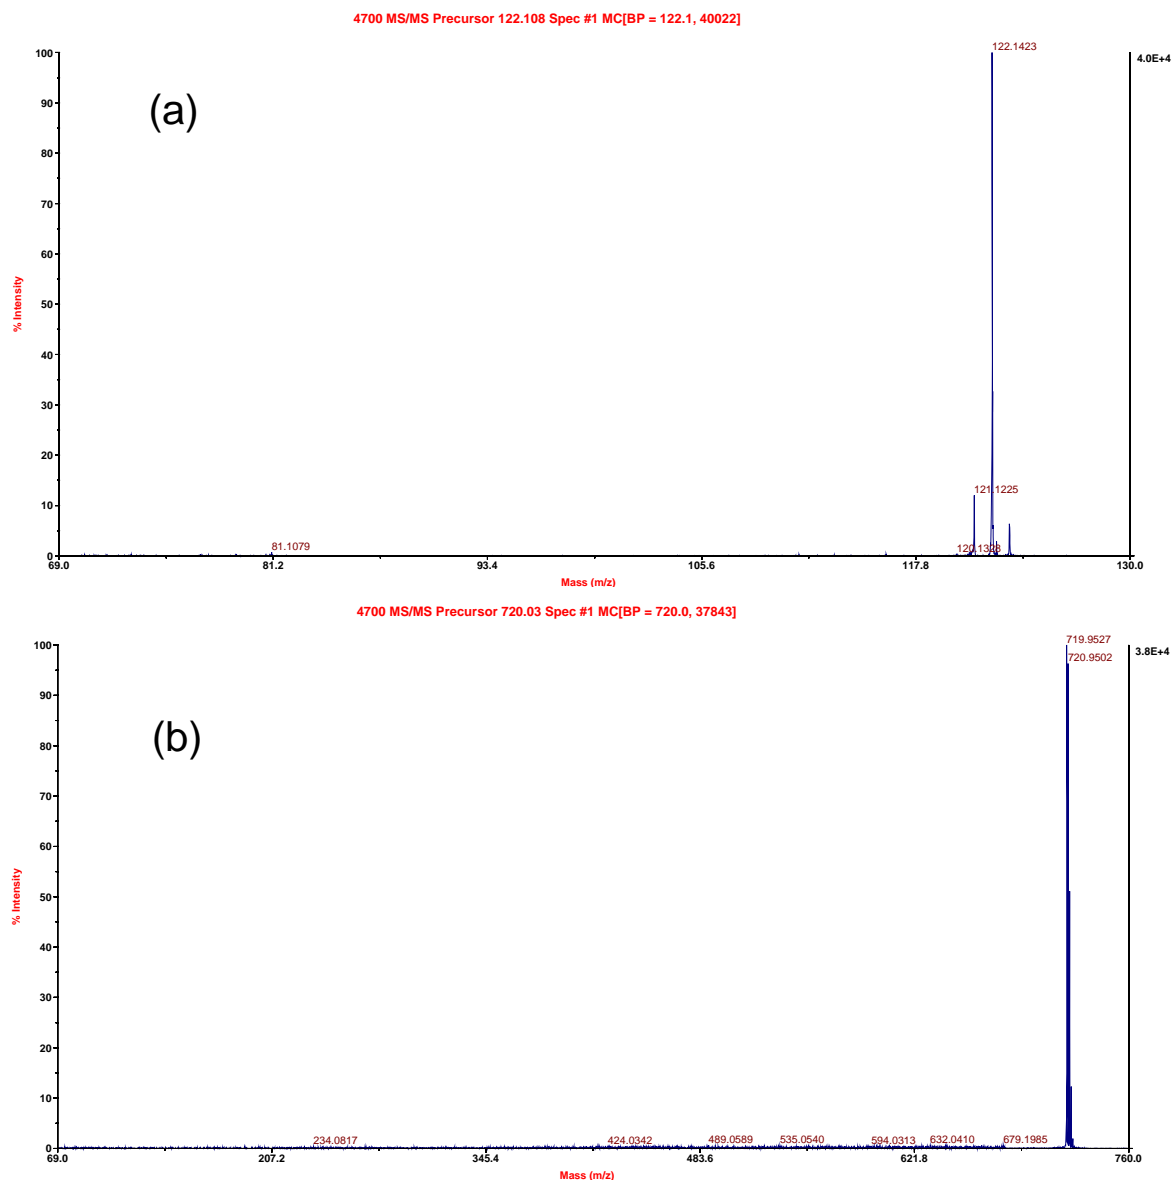

**Fig. 5** MALDI-TOF-MS-MS spectrum of C<sub>60</sub>-rubeanic acid derivative; (a) peak at  $m/z$  122 and (b) peak at  $m/z$  720.

## References

- 1 M.S. Dresselhaus, G. Dresselhaus, P.C. Eklund, *Science of fullerene and carbon nanotube*; Academic Press; San Diego, CA, 1996.
- 2 NIST Chemistry WebBook (<http://webbook.nist.gov/chemistry>).
- 3 J. Coates, *Interpretation of infrared spectra, a practical Approach*, in *Encyclopedia of Analytical Chemistry*; R.A. Meyers (Ed.), John Wiley & Sons; Chichester, 2000.
- 4 J. Janahi, M. Premila, P. Gopalan, V.S. Sastry, C.S. Sundar, *Thermochimica Acta* 2000, **356**, 109.
